# Supplementary material for: Long non-coding RNA MEG3 promotes cisplatin-induced nephrotoxicity through regulating AKT/TSC/mTOR-mediated autophagy
Source: PubMed Central journal article supplement (PMC8495387; doi:10.7150/ijbs.58910), 2021-09-21
Supplement: ijbsv17p3968s1.pdf [file ijbsv17p3968s1.pdf]

**Supporting Information for  
Original article**

**Long noncoding RNA MEG3 promotes cisplatin-induced nephrotoxicity through regulating AKT/TSC/mTOR-mediated autophagy**

Xu Jing <sup>1</sup>, Jinming Han <sup>2</sup>, Junhao Zhang <sup>3</sup>, Yi Chen <sup>4</sup>, Juan Yuan <sup>5</sup>, Jue Wang <sup>6</sup>, Shiyong Neo <sup>4</sup>, Shuijie Li <sup>7</sup>, Xueyuan Yu <sup>8</sup>, Jing Wu <sup>9\*</sup>

<sup>1</sup> Department of Clinical Laboratory, The Second Hospital of Shandong University, Jinan, 250000, China; <sup>2</sup> Department of Clinical Neuroscience, Karolinska Institute, S-171 76, Sweden; <sup>3</sup> Department of Oncology, Nanfang Hospital, Southern Medical University, Guangzhou, 510515, China; <sup>4</sup> Department of Oncology-Pathology, Karolinska Institutet, Stockholm, Sweden; <sup>5</sup> Department of Cell and Molecular Biology, Karolinska Institute, S-171 76, Sweden; <sup>6</sup> Key Laboratory, The Second Hospital of Shandong University, Jinan, 250000, China; <sup>7</sup> Department of Microbiology, Tumor and Cell Biology, Karolinska Institute, S-171 76, Sweden; <sup>8</sup> Department of Nephrology, Qilu hospital; <sup>9</sup> Department of Pharmacology, The Second Hospital of Shandong University, Jinan, 250000, China;

**\*Correspondence should be addressed to:**

Jing Wu, PhD, Department of Pharmacology, The Second Hospital of Shandong University, 247#, Beiyuan Road, Jinan, 250000, Shandong Province, P.R. China.

Tel: 0737803095

Email: [wujing@sdu.edu.cn](mailto:wujing@sdu.edu.cn)

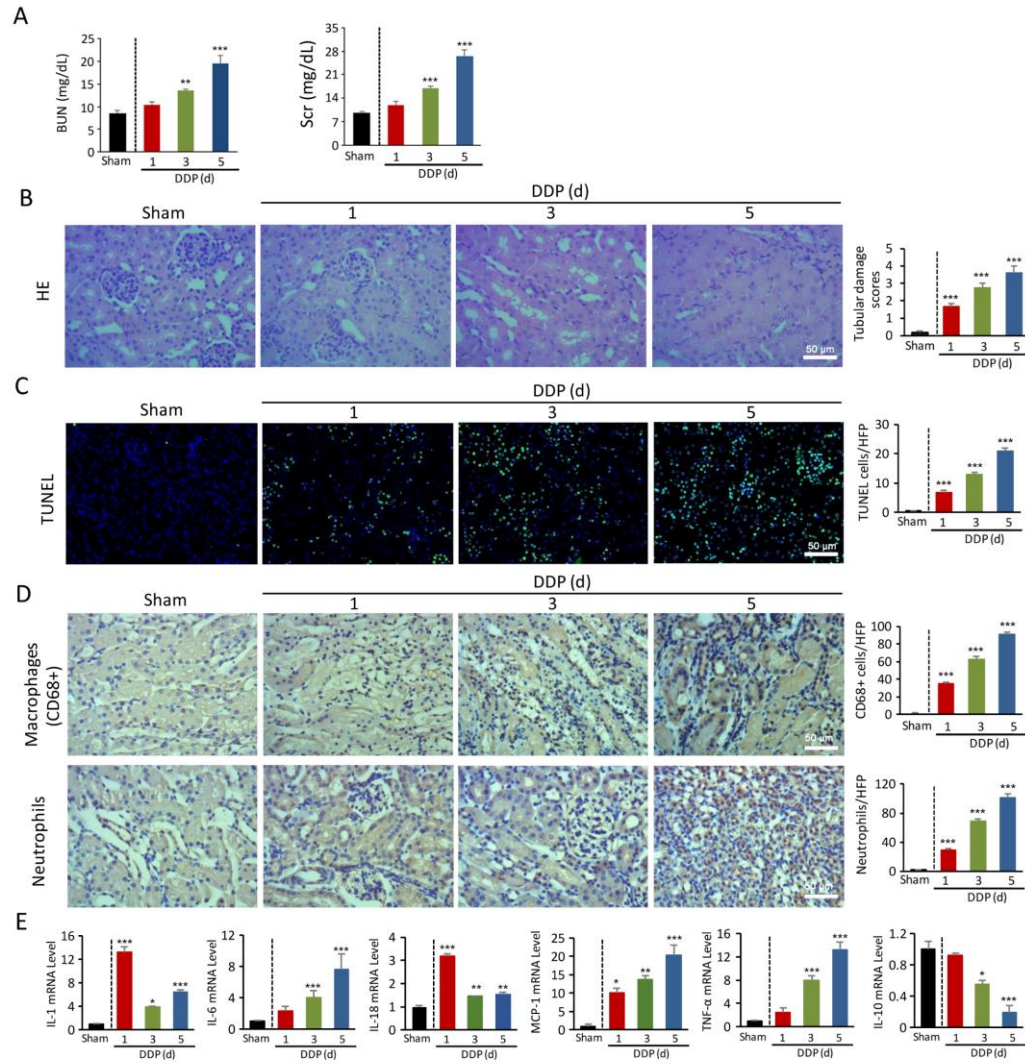

**Figure S1 Inflammation and apoptosis were increased dramatically in the kidney of DDPIN mice.** The content of BUN and SCr (A) in the serum of DDPIN mice. HE staining (A and B) and TUNEL staining (C and D) in the kidneys of DDPIN mice. (E) Immunohistochemical staining of neutrophils and CD68<sup>+</sup> macrophages and data analysis (F) in the kidneys of DDPIN mice. (G) RT-PCR analysis of IL-1, IL-6, IL-10, IL-18, MCP-1 and TNF- $\alpha$ . \* $P < 0.05$ , \*\* $P < 0.01$ , \*\*\* $P < 0.001$  versus control (n=6).

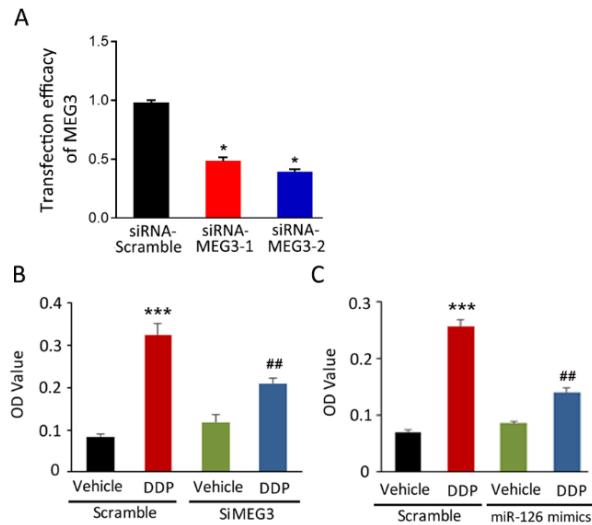

**Figure S2 *lnc-MEG3* silence and miRNA-126 mimics reverse the apoptosis induced by DDP.** (A) The transfection efficacy of siRNA-MEG3 were detected. MTT results of DDP-treated HK-2 cells in the condition of *lnc-MEG3* silence (B) and miRNA-126 mimics (C). \* $P < 0.05$ , \*\* $P < 0.01$ , \*\*\* $P < 0.001$  versus control, # $P < 0.05$ , ## $P < 0.01$ , ### $P < 0.001$  versus DDP-treated control (n=3).

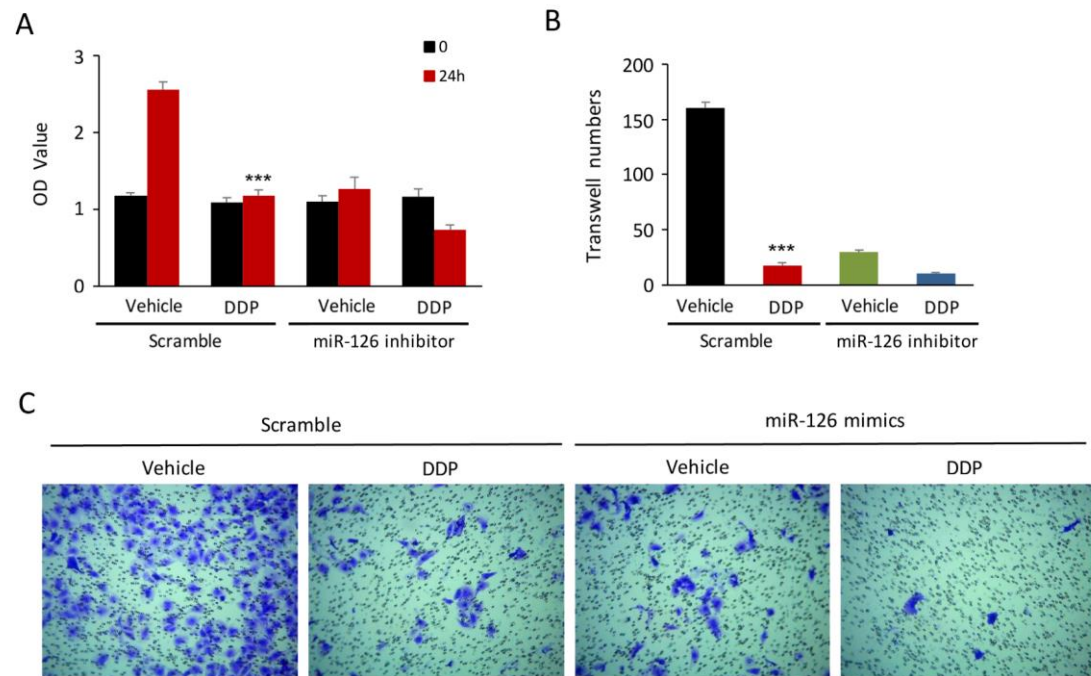

**Figure S3 MiRNA-126 inhibitor aggravates the proliferation and migration of the DDP-treated HK-2 cells.** (A) CCK8 assay, (B and C) Transwell assay of HK-2 cell and data analysis in the condition of miRNA-126 inhibitor.  $*P < 0.05$ ,  $**P < 0.01$ ,  $***P < 0.001$  versus control,  $^{\#}P < 0.05$ ,  $^{\#\#}P < 0.01$ ,  $^{\#\#\#}P < 0.001$  versus DDP-treated control (n=3).

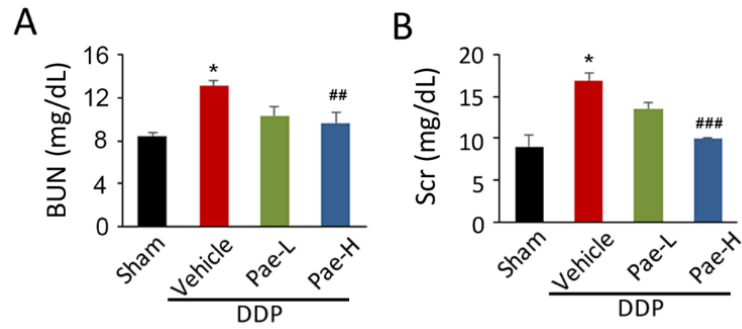

**Figure S4 Pae improves the proliferation and migration of the DDP-treated HK-2 cells.** (A) CCK8 assay, (B) Colony formation assay, Transwell assay of HK-2 cell (C) and data analysis.  $*P < 0.05$ ,  $**P < 0.01$ ,  $***P < 0.001$  versus control,  $^{\#}P < 0.05$ ,  $^{\#\#}P < 0.01$ ,  $^{\#\#\#}P < 0.001$  versus DDP-treated control (n=3).

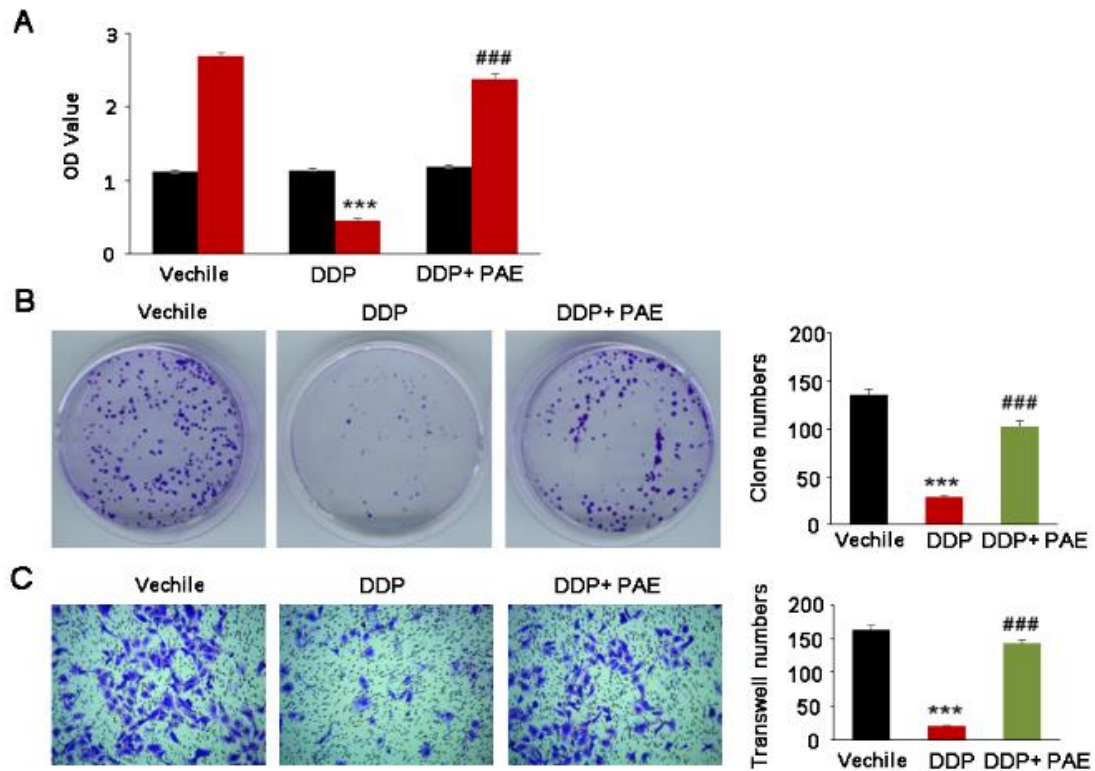

**Figure S5** Pae affects the expression of *lnc-MEG3* and miRNA-126. Pae could downregulate the expression of *lnc-MEG3* (A) and upregulate the expression of miRNA-126 (B) in mice at the dose of 15 mg/kg and 30 mg/kg. \* $P < 0.05$ , \*\* $P < 0.001$ , \*\*\* $P < 0.0001$  versus control, # $P < 0.05$ , ## $P < 0.01$ , ### $P < 0.001$  versus DDP-treated control (n=3).

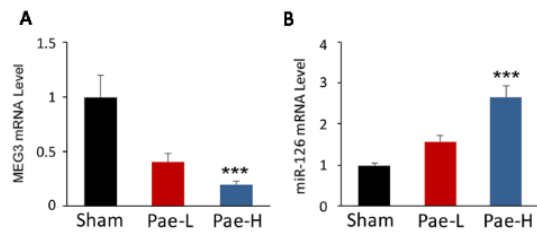

**Figure S6 Pae reversed DDP-induced elevated BUN and SCr.** Pae downregulates the content of BUN (A) and SCr (B) in the serum of DDPIN mice.  $*P < 0.05$ ,  $**P < 0.001$ ,  $***P < 0.0001$  versus control,  $^{\#}P < 0.05$ ,  $^{\#\#}P < 0.01$ ,  $^{\#\#\#}P < 0.001$  versus DDP-treated control (n=3).

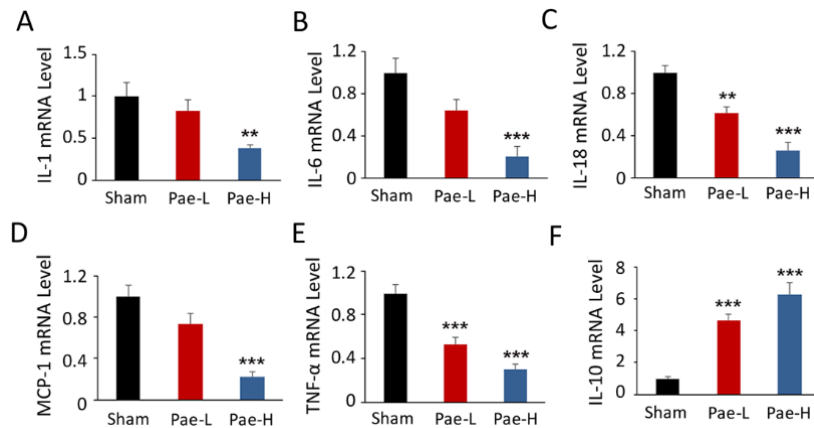

**Figure S7 Pae influences inflammatory cytokines.** Pae regulates the level of IL-1 (A), IL-6 (B), IL-10(C), IL-18(D), MCP-1(E) and TNF- $\alpha$  (F) in mice at the dose of 15 mg/kg and 30 mg/kg.  $*P < 0.05$ ,  $**P < 0.01$ ,  $***P < 0.001$  versus control (n=3).

**Table S1. Antibodies used in this study**

| Primary antibodies | Host   | Dilution and supplier                  | Catalog number | Application |
|--------------------|--------|----------------------------------------|----------------|-------------|
| AQP1               | Goat   | 1:100; Santa Cruz, Dallas, TX          | sc-9878        | IF          |
| Calbindin D28K     | Mouse  | 1:100; Santa Cruz, Dallas, TX          | sc-365360      | IF          |
| AQP3               | Goat   | 1:100; Santa Cruz, Dallas, TX          | sc-9885        | IF          |
| Neutrophil         | Mouse  | 1:100; AbD Serotec, Oxford, UK         | MCA805GA       | IF          |
| CD68               | Mouse  | 1:100; AbD Serotec, Oxford, UK         | MCA341GA       | IF          |
| LC3                | Rabbit | 1:500; Abcam, Cambridge, MA            | ab51520        | WB, IHC     |
| TSC2               | Rabbit | 1:500; ProteinTech Group, Chicago, IL  | 24601-1-AP     | WB, IHC     |
| TSC1               | Rabbit | 1:500; ProteinTech Group, Chicago, IL  | 20988-1-AP     | WB          |
| AKT                | Rabbit | 1:500; ProteinTech Group, Chicago, IL  | 10176-2-AP     | WB          |
| p-AKT              | Mouse  | 1:1000; ProteinTech Group, Chicago, IL | 66444-1-Ig     | WB          |



---

|          |        |                                        |            |    |
|----------|--------|----------------------------------------|------------|----|
| mTOR     | Rabbit | 1:1000; ProteinTech Group, Chicago, IL | 20657-1-AP | WB |
| p-mTOR   | Rabbit | 1:500; Abcam, Cambridge, MA            | ab109268   | WB |
| TBC1D7   | Mouse  | 1:1000; Santa Cruz, Dallas, TX         | sc-514595  | WB |
| Atg5     | Rabbit | 1:5000; ProteinTech Group, Chicago, IL | 10181-2-AP | WB |
| Beclin-1 | Rabbit | 1:1000; ProteinTech Group, Chicago, IL | 11306-1-AP | WB |
| GAPDH    | Rabbit | 1:1000; ProteinTech Group, Chicago, IL | 10494-1-AP | WB |

---

**Table S2.** Primer pairs of target genes used for real time RT-PCR in this study

| Genes              | Accession No.  | Forward                 | Reverse                |
|--------------------|----------------|-------------------------|------------------------|
| Mus TNF- $\alpha$  | NM_001278601.1 | GAAAAGCAAGCAGCCAACCA    | CGGATCATGCTTTCTGTGCTC  |
| Mus IL-1 $\beta$   | NM_008361.4    | CTGCAGCTGGAGAGTGTGG     | GGGGAACTCTGCAGACTCAA   |
| Mus IL-6           | NM_031168.1    | AGTTGCCTTCTTGGGACTGA    | TCCACGATTGCCAGAGAAC    |
| Mus MCP-1          | NM_011333.3    | ACCTGCTGCTACTCATTAC     | TTGAGGTGGTTGTGGAAAAG   |
| Mus IL-18          | NM_001357221.1 | ACTGGCTGTGACCCTCTCTG    | TGGATCCATTTCCCTCAAAGG  |
| MEG3               | NM_144513      | TCCTCACCTCCAATTTCCCCT   | GAGCGAGAGCCGTTTCGATG   |
| Mus $\beta$ -actin | NM_007393.3    | GGCTGTATTCCCCTCCATCG    | CCAGTTGGTAACAATGCCATGT |
| MiRNA-126          | NR_029713.1    | GGA ATG TAA GGA AGT GTG | GAG CAG GCT GGA GAA    |
